1 Cortical circuit-based lossless neural integrator  
2 for perceptual decision-making

3  
4 Jung H. Lee<sup>1\*</sup>, Joji Tsunada<sup>2</sup>, Sujith Vijayan<sup>3</sup>, and Yale E. Cohen<sup>2, 4, 5</sup>

5 <sup>1</sup>Allen Institute for Brain Science, Seattle, WA 98109

6 <sup>2</sup>Departments of Otorhinolaryngology, Perelman School of Medicine at the University of  
7 Pennsylvania, Philadelphia, PA 19104

8 <sup>3</sup>School of Neuroscience, Virginia Tech, Blacksburg VA, 24061

9 <sup>4</sup>Department of Neuroscience, University of Pennsylvania, Philadelphia PA, 19104

10 <sup>5</sup>Department of Bioengineering, University of Pennsylvania, Philadelphia, PA 19104

11 \*Correspondence to Jung H. Lee at [jungl@alleninstitute.org](mailto:jungl@alleninstitute.org)

12

13

14

15

16

17

## 18 Abstract

19 The intrinsic uncertainty of sensory information (i.e., evidence) does not necessarily deter an  
20 observer from making a reliable decision. Indeed, uncertainty can be reduced by integrating  
21 (accumulating) incoming sensory evidence. It is widely thought that this accumulation is  
22 instantiated via recurrent rate-code neural networks. Yet, these networks do not fully explain  
23 important aspects of perceptual decision-making, such as a subject's ability to retain accumulated  
24 evidence during temporal gaps in the sensory evidence. Here, we utilized computational models  
25 to show that cortical circuits can switch flexibly between 'retention' and 'integration' modes  
26 during perceptual decision-making. Further, we found that, depending on how the sensory  
27 evidence was readout, we could simulate 'stepping' and 'ramping' activity patterns, which may be  
28 analogous to those seen in different studies of decision-making in the primate parietal cortex. This  
29 finding may reconcile these previous empirical studies because it suggests these two activity  
30 patterns emerge from the same mechanism.

31

32

33

34

35

36

## 37 Introduction

38 One of the fundamental operations of the brain is to transform representations of external sensory  
39 stimuli (i.e., sensory evidence) into a categorical judgment, despite the inherent uncertainty of this  
40 sensory evidence. For instance, we can determine the direction of the wind, even though its  
41 instantaneous direction continuously fluctuates. It is widely thought that this moment-by-moment  
42 uncertainty is minimized by temporally integrating (accumulating) this incoming sensory  
43 evidence<sup>1-4</sup>. Potential neural correlates of this accumulation process have been identified in a  
44 variety of brain areas, including the lateral intraparietal cortex (area LIP)<sup>2,3,5</sup>, the prefrontal cortex<sup>6</sup>,  
45 and the frontal eye fields<sup>7</sup>. In particular, spiking activity in these brain areas appears to smoothly  
46 ‘ramp up’ (accumulate; i.e. linearly increasing activity over time) prior to a perceptual decision.  
47 Further, the rate of this accumulation, which governs the time to reach a decision threshold (i.e.,  
48 the time to the perceptual decision), is correlated with the ambiguity of the sensory evidence: as  
49 the evidence becomes less ambiguous (e.g., the instantaneous fluctuations in wind direction  
50 decrease), the rate of the ramping increases<sup>3</sup>.

51 Such neural integration has been modeled in two very different ways, each of which relies on  
52 different coding strategies and mechanisms of integration<sup>1</sup>. In the first type of model, rate-code  
53 neural integrators (NI) integrate sensory evidence and represent accumulated evidence as  
54 monotonically increasing (‘ramping’) spiking activity. In this rate-code model, the firing rates of  
55 individual neurons increase over time in response to continuous inputs<sup>2,3,8</sup>. In an alternative model,  
56 location-code NIs store accumulated evidence as the location of highly elevated spiking activity.  
57 In such a location-code NI, the location of these highly active neurons, which are referred to as a  
58 ‘bump’, travels through a network over time<sup>9,10</sup>. That is, the location of bump activity corresponds  
59 to the total amount of accumulated evidence.

60 Because ramping activity has been found in several studies of perceptual decision-making<sup>1,3</sup>, it is  
61 generally believed that a rate-code NI is the natural circuit candidate for neural integration of  
62 sensory information. However, recent behavioral studies have questioned whether a rate-code NI  
63 can, in fact, accurately capture the dynamics of perceptual decision-making. For example, a  
64 temporal gap between stimulus presentations has little impact on the accuracy of an observer's  
65 behavioral choices<sup>11,12</sup>, indicating that accumulated evidence can be maintained during this  
66 temporal gap. Yet, during this gap, the firing rates of neurons in a rate-code NI are likely to deviate  
67 from the desired values if the network is perturbed even slightly<sup>11</sup>. This deviation can occur  
68 because a rate-code NI's feedback (recurrent) inputs and its leaky currents have to be precisely  
69 balanced in order to maintain the desired values during such temporal gaps<sup>11,13</sup>.

70 Further, the nature of neuronal activity during decision-making calls into question the suitability  
71 of rate-code NIs. Traditionally, as noted above, decision-making activity, at both the single-  
72 neuronal and population level, was thought to be best described as ramping activity<sup>2,3,5</sup>. However,  
73 recent studies indicate that, whereas population-level activity can be thought of as ramping, single-  
74 neuronal activity may be better described as discrete 'steps' (changes) in neuronal activity<sup>14-16</sup>. If  
75 this stepping activity is an accurate descriptor of decision-making activity, it follows that rate-code  
76 NIs may not be an appropriate model: because single-neuron activity and population-level activity  
77 in rate-code NI are completely correlated in rate-code NIs, it is not clear how single-neuron  
78 stepping activity can become population-level ramping activity.

79 In contrast to a rate-code NI, a location-code NI can maintain stable states even in the absence of  
80 external inputs<sup>9</sup>. Further, neurophysiological studies have identified sequential activation that is  
81 similar to this propagation of bump activity<sup>17-21</sup>, and a theoretical study<sup>22,23</sup> proposed that such a  
82 network can be constructed out of commonly found depressing synapses<sup>24-29</sup>. Inspired by these

83 findings, we constructed a computational model of cortical circuits with depressing synapses to  
84 test the hypothesis that a location-code NI is a viable model for perceptual decision-making.  
85 We found that, like previous location-code NIs, a neurobiologically inspired network can sustain  
86 bump activity at a specific location when there is a temporal gap in sensory evidence, whereas  
87 sensory evidence causes bump activity to propagate through the network. Our model is unique in  
88 that it is based on depressing synapses and the interplay between two commonly found inhibitory  
89 neuron types<sup>30,31</sup>. We also found that the sensory evidence, which is stored as the location of bump  
90 activity, could be readout in two different modes, depending on the connections with downstream  
91 readout neurons. When the connectivity between integrator and downstream readout neurons was  
92 dense, readout neurons predominantly showed classic ramping activity as the sensory evidence  
93 was accumulated into a decision variable<sup>1,3,5</sup>. In contrast, when the connectivity was sparse,  
94 readout neurons predominantly exhibited stepping activity<sup>16</sup>; that is, the firing rate of individual  
95 neurons changed from one state to another transiently, whereas population activity gradually  
96 ramped over time. This observation predicts that either ramping or stepping modes can emerge,  
97 depending on the connectivity. This dual-readout mode may, in part, reconcile the degree to which  
98 components of decision-making are encoded as ramping- or stepping-like spiking activity.

99

## 100 Results

101 This section describes how cortical circuits can implement a lossless integrator. The first  
102 subsection describes simulation results suggesting that generic cortical circuits (Fig. 1A), which  
103 contain two common types of inhibitory neurons and depressing synapses, can readily realize a  
104 lossless ('perfect') location-code NI. The second subsection discusses bifurcation analyses of  
105 abstract models of rate- and location-code NIs, which were conducted to examine how reliably  
106 these two types of NIs can retain sensory evidence during temporal gaps in the sensory evidence.  
107 In the third subsection, we propose a location-code NI that can have continuous attractors (Fig.  
108 1B). Finally, we discuss how evidence accumulated in our integrators can be readout by  
109 downstream neurons. Interestingly, this readout activity maps onto two different modes of spiking  
110 activity that have been identified during neurophysiological studies of decision-making: classic  
111 'ramping' activity<sup>2</sup> and newly identified 'stepping' activity<sup>16</sup>.

### 112 Cortical circuits can readily implement lossless location integrator

113 Cortical circuits have three common properties that are relevant for our model. First, pyramidal  
114 (Pyr) neurons in sensory cortex are topographically organized as a function of their sensory  
115 response profiles via spatial<sup>32,33</sup> and functional<sup>34</sup> connections. Second, cortical circuits also contain  
116 parvalbumin positive (PV) and somatostatin positive (SST) inhibitory interneurons<sup>30</sup>. PV neurons  
117 have a fast-spiking pattern of activity, whereas SST neurons have a low-threshold spiking pattern.  
118 For our purposes, it is important to note that, although most inhibitory interneurons are broadly  
119 tuned to sensory inputs, the response profiles of SST neurons can be as sharply tuned as those of  
120 Pyr neurons<sup>35</sup>. Third, via lateral inhibition, SST neurons inhibit neighboring cortical neurons<sup>36-39</sup>.

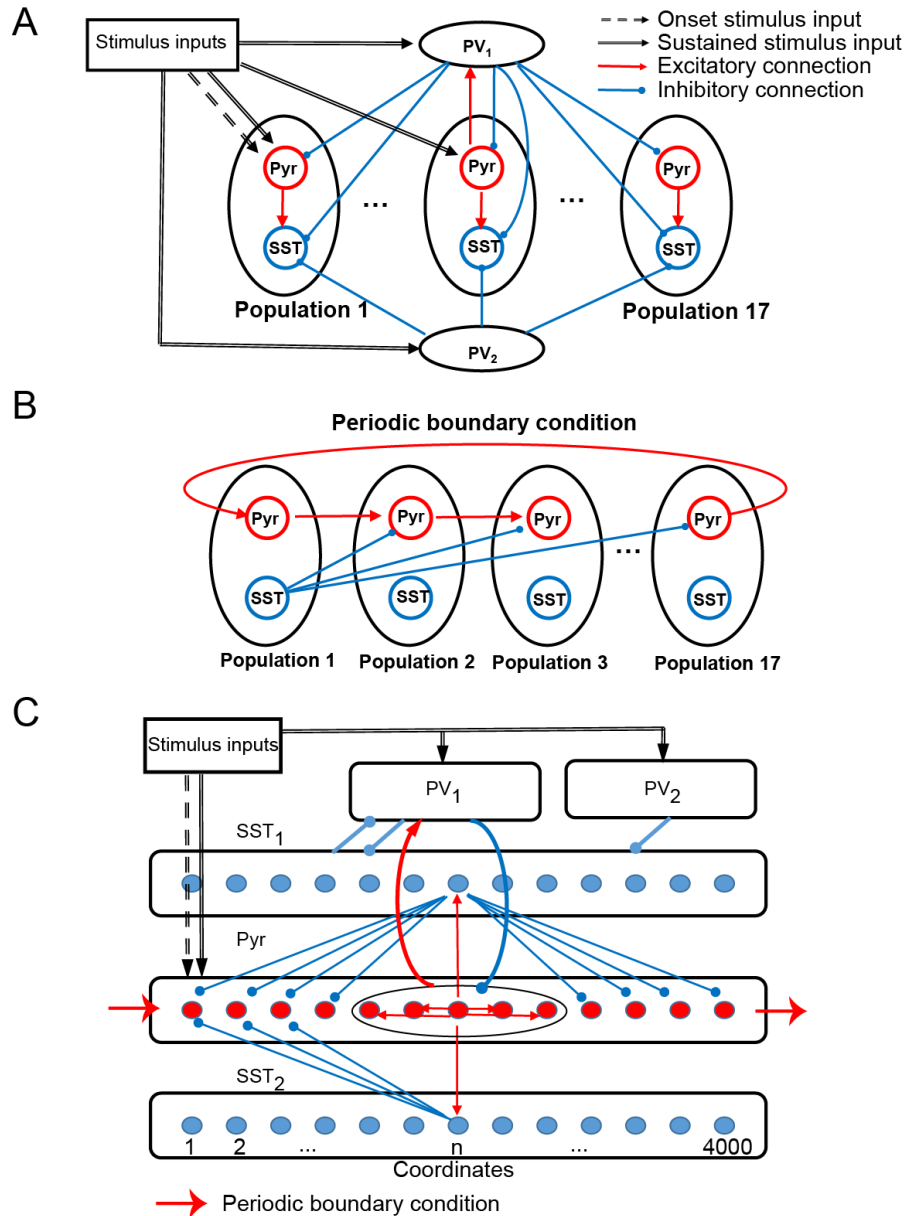

121

122 **Figure 1: The structure of the two versions of our integrator.** (A), Connectivity between all 19 neuronal  
 123 populations in the *discrete* integrator. (B), Interconnectivity between the 17 Pyr-SST populations; see  
 124 **Methods** and Tables 1 and 2 for more details and parameters. Red and blue arrows indicate excitatory and  
 125 inhibitory connections within the network model, respectively. Dashed and thick black arrows represent  
 126 onset and sustained stimulus inputs, respectively. (C), Structure of *continuous* integrator. The five neuronal  
 127 populations (Pyr, PV<sub>1</sub>, PV<sub>2</sub>, SST<sub>1</sub>, and SST<sub>2</sub>) interact with each other via connections shown in the figure.  
 128 The thin red arrows and blue arrows represent the excitatory and inhibitory connections between individual  
 129 neurons, respectively. In contrast, the thick arrows (including red and blue) show connections between the  
 130 neuronal populations. All connections between populations are randomly established. Sensory inputs are  
 131 introduced to Pyr, PV<sub>1</sub> and PV<sub>2</sub> (dashed arrows). Periodic boundary condition is used to connect Pyr cells,  
 132 as shown in the red arrow; see **Methods** and Table 3 for more details and parameters.

133 Based on previous modelling studies<sup>22,23</sup> that proposed propagating bump activity can be elicited  
134 by depressing synapses, we built a cortical network model (Fig. 1A), in which Pyr neurons  
135 interacted with one another through intra-population depressing synapses<sup>24-29</sup> and inter-population  
136 unidirectional static synapses. We refer to this cortical network model as the ‘discrete’ integrator;  
137 see Methods for more details. Transient sensory stimuli (100 ms), which mimicked sensory-driven  
138 onset responses in sensory cortex<sup>40-43</sup>, only drove Pyr cells in the first population. In contrast,  
139 sustained sensory stimuli (after 100 ms) drove Pyr neurons in all neuronal populations. In our first  
140 simulation, we only provided Pyr and PV neurons with sensory evidence at two discrete time  
141 intervals: time=100-300 ms and during time=800-1000 ms.

142 As seen in Fig. 2A, the Pyr populations were sequentially activated by sensory stimulation. Further,  
143 on average, both populations of PV neurons were more active during sensory stimulation than  
144 during the temporal gap (Fig. 2B). More importantly, when there was a temporal gap in the sensory  
145 evidence (as indicated by the black double-headed arrow in Fig. 2A), the sequential activation of  
146 the network stopped but activity was maintained by a specific population of Pyr neurons (Pyr  
147 population 5 in Fig. 2A). That is, during a temporal gap in the sensory evidence, the network  
148 retained the accumulated information, a finding that is consistent with lossless integration. When  
149 we presented the second sensory stimulus, information resumed propagating through the network  
150 as seen by the sequential activation of Pyr population 6, followed by population 7, etc.

151 When we explored the network in more detail, we found key roles for the inhibitory neurons and  
152 for the depressing synapses. For example, SST neurons were active only during the temporal gap  
153 (Fig. 2C) and that bump activity did not propagate when we replaced the depressing synapses with  
154 static synapses (Fig. 2D). We also noted that the non-specific feedback inhibition of PV<sub>1</sub> neurons  
155 play a key role to activate an appropriate population of neurons (i.e., Pyr population 6 in Fig. 2A,



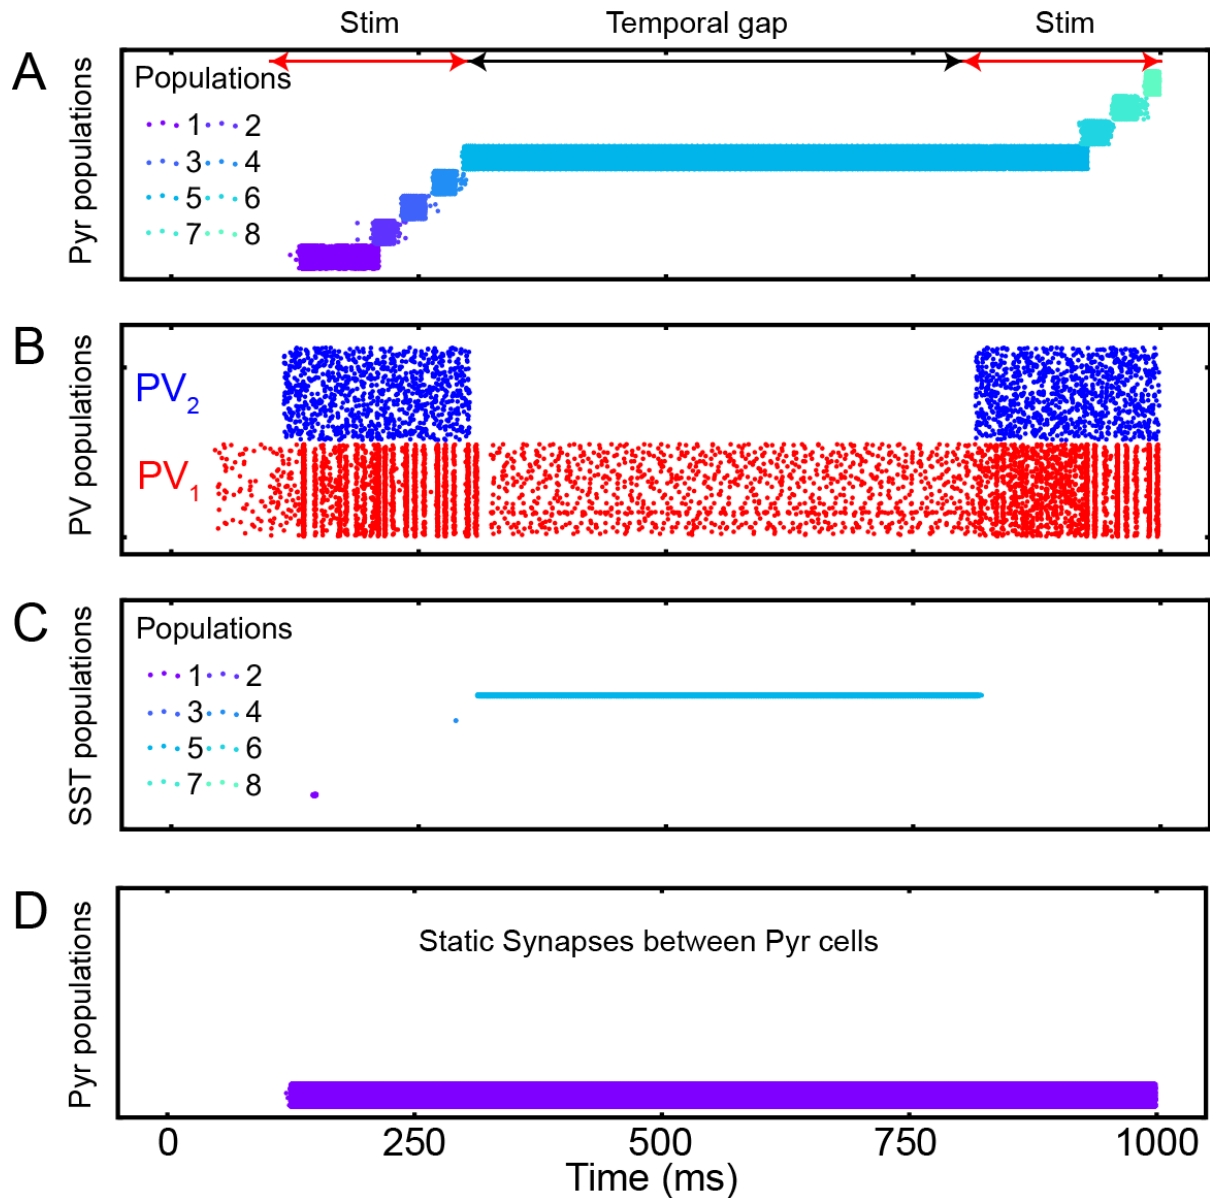

156

157 **Figure 2: The responses of populations of the discrete integrator.** (A), Spiking activity of Pyr neurons  
 158 in all 17 neuronal populations; each population had 400 Pyr neurons. Each row in the plot shows the spike  
 159 times of an individual Pyr neuron. Each of the 17 populations are shown in a different color; see legend for  
 160 the color codes of a subset of these populations. The red and black arrows show sensory-stimulus periods  
 161 and the temporal gap between them, respectively. During a 1000 msec-long simulation, we noted that only  
 162 8 populations were activated. (B), PV<sub>1</sub> and PV<sub>2</sub> activity during the sensory-stimulus periods and the  
 163 temporal gap between both. Both PV populations contained 1088 PV neurons. (C), SST neuron activity in  
 164 all 17 populations; there are 16 SST neurons in each population. The same color scheme is used as in (A).  
 165 SST neurons became active only during the temporal gap, and they belong to the same population. (D) Pyr  
 166 activity when all depressing synapses are replaced with static ones.

167 following the temporal gap). Without this inhibition, when we presented the second sensory  
168 stimulus, Pyr population 1 (which was activated by the first initial 100-ms of sensory stimulation)  
169 was inappropriately activated. This altered the amount of accumulated information (supplemental  
170 Fig. 1).

## 171 The stability of sensory evidence during a temporal gap in location-code NIs and in 172 rate-code NIs

173 Next, we asked whether a location-code NI could retain sensory evidence during a temporal gap  
174 more reliably than a rate-code NI. To address this question, we created close-form firing-rate  
175 models that described the rate- and location-code NIs. We modeled a rate-code NI with a single  
176 recurrent neural population<sup>1</sup> (Equation 1; see the inset of Fig. 3A), whereas we modeled a location-  
177 code NI with two recurrent neural populations because it relies on the sequential activation of  
178 neurons (Equation 2).

179 The firing rate of the rate-code recurrent network obeys Equation 1<sup>1</sup>:

$$180 \quad \tau_m \frac{dF_e}{dt} = -F_e + F_{max} \frac{1}{[1 + e^{-\beta(rF_e + E - \theta)}]}, \quad (1)$$

181 where  $F_e$  and  $r$  are the firing rate and recurrent connection strength, respectively;  $F_{max}$  is the  
182 maximum firing rate;  $\theta$  is the spiking threshold;  $E$  is the external input; and  $\beta$  represents the  
183 strength of stochastic inputs<sup>44</sup>.  $F_e$  represents the leak current. The selected default parameters are  
184  $F_{max}=20$ ,  $\beta=1$ ,  $\theta=0.5$ ,  $r=1$  and  $E=0$ , unless stated otherwise. We modeled the gain (transfer function;  
185 i.e., the number of spikes that a neuron can generate in response to afferent synaptic activity) with  
186 a logistic function<sup>44</sup>. The firing rate of this neuron increases, as  $r$  increases, which represents the  
187 relative strength of recurrent inputs; in our model,  $r$  is dimensionless.

188 We tested the stability of this rate-code NI during a temporal gap, in which external inputs are  
189 absent (i.e.,  $E=0$ ), by conducting a bifurcation analysis with the XPPAUT analysis platform<sup>45</sup>. A  
190 bifurcation analysis identifies the steady-state solutions, in which a system can stay indefinitely  
191 until perturbed. Moreover, this analysis clarifies whether the steady-state solutions are stable in  
192 response to perturbations of the bifurcation parameters (which, in our analysis, is either the  
193 strength of the recurrent connections  $r$  or the external inputs  $E$ ; see the inset of Fig. 3A). That is,  
194 we tested if a rate-code NI is stable in response to small changes in either recurrent inputs or  
195 external inputs.

196 In Figs. 3A and B, the stable and unstable steady-state solutions are shown in red and black,  
197 respectively. As seen in these figures, this recurrent rate-code NI (Equation 1) has only two stable  
198 attractor states, in which neurons either fire at their maximum rate ( $F_{max}$ ) or become quiescent.  
199 This implies that if there is a small perturbation in the strength of the recurrent connections or if  
200 there are changes in the sensory stimuli (e.g., a temporal gap in the incoming sensory information,  
201  $E=0$ ), this network could lose temporally accumulated information<sup>11</sup>.

202 The dynamics of a location-code NI relies are captured with the following equations (Equation 2):

$$203 \quad \tau_m \frac{dF_1}{dt} = -F_1 + F_{max} \frac{1}{[1+e^{-\beta(rF_1-r_mF_2+E_1-\theta)}]}$$

$$204 \quad \tau_m \frac{dF_2}{dt} = -F_2 + F_{max} \frac{1}{[1+e^{-\beta(rF_2-r_mF_1+E_2-\theta)}]} \quad (2)$$

205 Each of the two populations had their own recurrent connections ( $r$ ) and interacted with each other  
206 via lateral connections ( $r_m$ ); see Figure 3C. This mutual inhibition models the lateral inhibition  
207 mediated by SST and PV neurons in our computational model (Fig. 1). In its initial state, we  
208 assumed that population 1 fired at the maximum rate, and population 2 was quiescent; that is,

209 population 1 had bump activity. We tested the stability of this network by examining its response  
 210 to perturbations in the recurrent connections within a population ( $r$ ), the external inputs ( $E_1$ ,  $E_2$ ) to  
 211 populations 1 and 2, or the lateral interactions ( $r_m$ ) between the two populations.

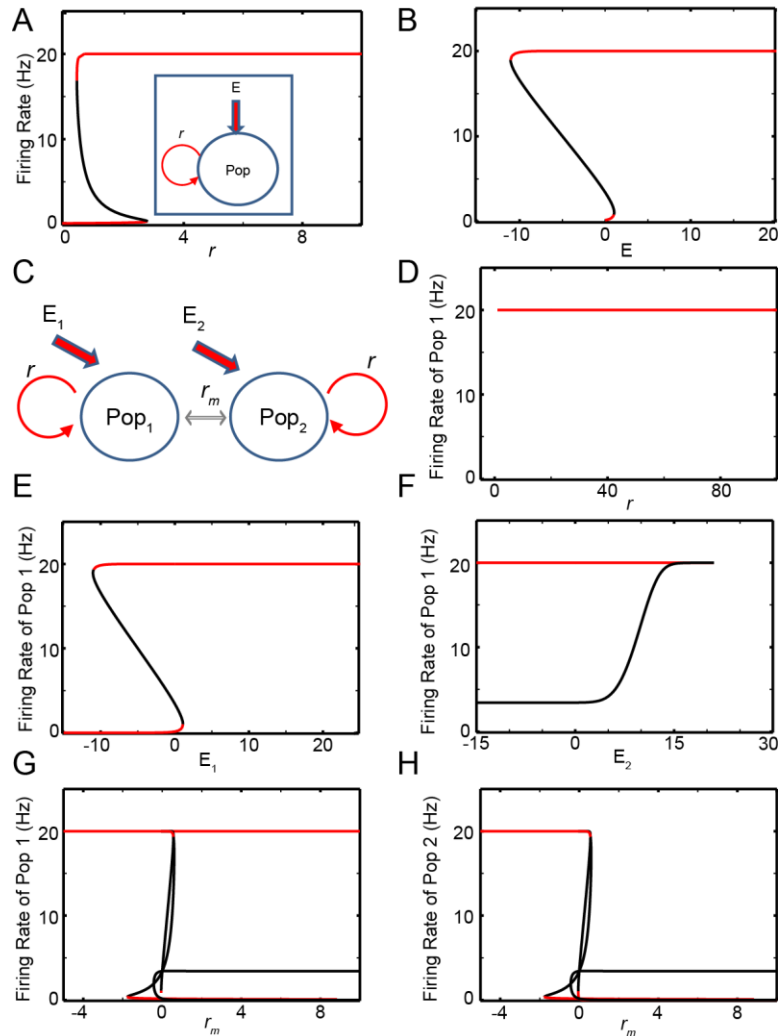

212  
 213 **Figure 3: The bifurcation analysis of rate- and location-code NIs.** (A) and (B), Bifurcation analyses  
 214 with the recurrent connections ( $r$ ) and the external inputs ( $E$ ) as bifurcation parameters for the recurrent  
 215 rate-code network model, respectively; the schematic of this network model is shown in the inset of (A). (C),  
 216 Schematic of the reduced model of location-code NI. (D)-(F) Bifurcation analysis of the firing rate of  
 217 population 1 with respect to within-population recurrent connections ( $r$ ) and external input to populations  
 218 1 and 2 ( $E_1$ ,  $E_2$ ), respectively. (G) and (H), Bifurcation analysis of firing rate of populations 1 and 2,  
 219 respectively, in terms of the lateral interactions ( $r_m$ ). Red and black lines represent stable and unstable  
 220 steady solutions, respectively. Pop: neuronal population.

221

222 Three main findings emerged from this analysis. First, as the recurrent-connection strength ( $r$ )  
223 increased, the network remained stable (Fig. 3D). Second, the network remained stable as we  
224 increased  $E_1$  (i.e., the external input to population 1; the red lines in Fig. 3E) but became unstable  
225 (i.e., population 1 lost its bump activity) when  $E_1$  was reduced (black lines in Fig. 3E). On the  
226 other hand, as shown in Fig. 3F, the network became unstable when  $E_2$  (i.e., the external input to  
227 population 2) increased, but it became stable when  $E_2$  decreased. In other words, the noise  
228 introduced into quiescent populations needed to be regulated in order for the network to reliably  
229 retain information. Finally, the lateral interactions ( $r_m$ ) strongly impacted the stability of the  
230 network. When  $r_m$  was positive but small (i.e., weak mutual inhibition), the network became  
231 unstable (the black lines in Fig. 3G). In contrast, when  $r_m$  was positive and large (i.e., strong mutual  
232 inhibition), population 1 reliably retained bump activity (Fig. 3G), and population 2 remained  
233 quiescent (Fig. 3H). That is, as long as population 1 retained bump activity initially, the mutual  
234 inhibition helped population 1 keep its bump activity. When the two populations excited each other  
235 (i.e., negative  $r_m$ ), neurons in both populations fired at the maximum rate (Figs. 3G and H). In this  
236 case, bump activity was not confined to population 1, indicating that a readout of bump activity  
237 based on location was not an accurate reflection of the accumulated evidence.

238 In brief, these analyses illustrate noticeable difference between rate- and location-code NIs. The  
239 rate-code NI encodes sensory evidence with different values of firing rate, but its steady-state  
240 response during a temporal gap is not stable (Figs. 3A and B). That is, it would lose evidence quite  
241 readily if there were even small perturbations during a temporal gap<sup>11</sup>. In contrast, a location-code  
242 NI is stable during a temporal gap (Figs. 3D and G), if the recurrent connections within a  
243 population and a mutual inhibition are sufficiently strong. Thus, during temporal gaps in sensory  
244 evidence, location-code NIs can potentially retain evidence more reliably than rate-code NIs.

245

## 246 Continuous location-code neural integrator

247 The discrete location-code NI (Fig. 1A) has limited precision: the accumulated evidence needs to  
248 be quantized to be stored in the discrete populations. This limitation, however, is not a fundamental  
249 restriction because this discrete network can be generalized to have continuous attractor states by  
250 distributing Pyr and SST neurons into circular lattices with uniquely assigned coordinates (Fig.  
251 1C). We call this a ‘continuous lossless integrator’. For convenience, we refer to the direction from  
252 lower to higher coordinates as the clockwise direction and higher to lower as counterclockwise.  
253 Two Pyr neurons were connected in this network if the difference between their coordinates was  
254  $\leq 200$ . Because the connections were symmetrical, each Pyr neuron made excitatory synapses with  
255 400 of its neighboring Pyr neurons.

256 All Pyr and SST neurons formed non-specific connections with  $PV_1$  neurons.  $PV_2$  neurons  
257 exclusively provided feedforward inhibition to  $SST_1$  neurons. The connections between Pyr  
258 neurons and SST neurons were formed based on their coordinates in the circular lattice. (1) Pyr  
259 neurons made one-to-one synaptic (‘topographic’) connections with  $SST_1$  and  $SST_2$  neurons, when  
260 they had the same coordinates. (2) A  $SST_1$  neuron inhibited a Pyr neuron when the (absolute)  
261 difference between their coordinates was  $\geq 200$ . (3) A  $SST_2$  neuron inhibited a Pyr neuron when  
262 the coordinate of a Pyr neuron was lower than that of a  $SST_2$  neuron and when the (absolute)  
263 coordinate difference was between 400 and 800. Because of this connectivity pattern, the  
264 propagation of bump activity in the counter-clockwise direction was dampened, which is possible  
265 with symmetrical chain-like recurrent connections, and only bump activity in the clockwise  
266 direction propagated through the network.

267 In our first analysis, we examined whether our continuous integrator could integrate sensory  
268 evidence (see Table 3 for model-parameter details). To test this integrator, we first presented a  
269 transient sensory input (time=100-200 ms) to the first 400 Pyr neurons (i.e., those with the lowest  
270 coordinates), followed by a more sustained sensory stimulus (time=100-1000) to all Pyr and PV  
271 neurons. As seen in Fig. 4A, this transient sensory stimulus elevated the rate of spiking activity  
272 strongly enough to generate bump activity. However, once generated, the feedback inhibition  
273 mediated by the PV<sub>1</sub> neurons was strong enough to prevent all other excitatory neurons from  
274 spiking during the presentation of this transient sensory stimulus.

275 After the offset of this transient input, bump activity propagated to other Pyr neurons in the  
276 clockwise direction (Fig. 4A). Due to the periodic boundary condition, bump activity repeatedly  
277 circulated the integrator. In our model, because excitatory synapses had not fully recovered, when  
278 the bump activity returned to the initial location, it dissipated. As a consequence, the non-specific  
279 inhibition mediated by PV<sub>1</sub> neurons became weaker, which, in turn, resulted in Pyr activity at  
280 multiple locations (see Pyr cell activity after 500 ms in Fig. 4A). Concurrently, PV<sub>1</sub> and PV<sub>2</sub>  
281 neurons fired asynchronously (Fig. 4B). SST<sub>1</sub> neurons were quiescent (Fig. 4C), but SST<sub>2</sub> neurons,  
282 which received excitation from Pyr via topographic connections, mimicked Pyr activity (Fig. 4D).  
283 This SST<sub>2</sub> activity prevented bump activity from propagating in the counterclockwise direction  
284 due to its asymmetrical feedback inhibition onto Pyr neurons.

285 Next, we tested whether this network could perform lossless integration. Like the discrete neural  
286 integrator, we presented two epochs of sensory stimuli (time=100 and 300 ms and time=800-1000  
287 ms) that were separated by a period without sensory stimulation. For simplicity, we did not  
288 consider the onset input at 800 ms because this input had no impact on the network dynamics in  
289 the discrete integrator (Fig. 2A). As seen in Fig. 4E, bump activity cascaded through the network

290 until there was a temporal gap in the sensory evidence. During the temporal gap, bump activity  
 291 remained in the same location. Then, it resumed moving from the previous location, as information  
 292 was reintroduced, consistent with lossless integration.

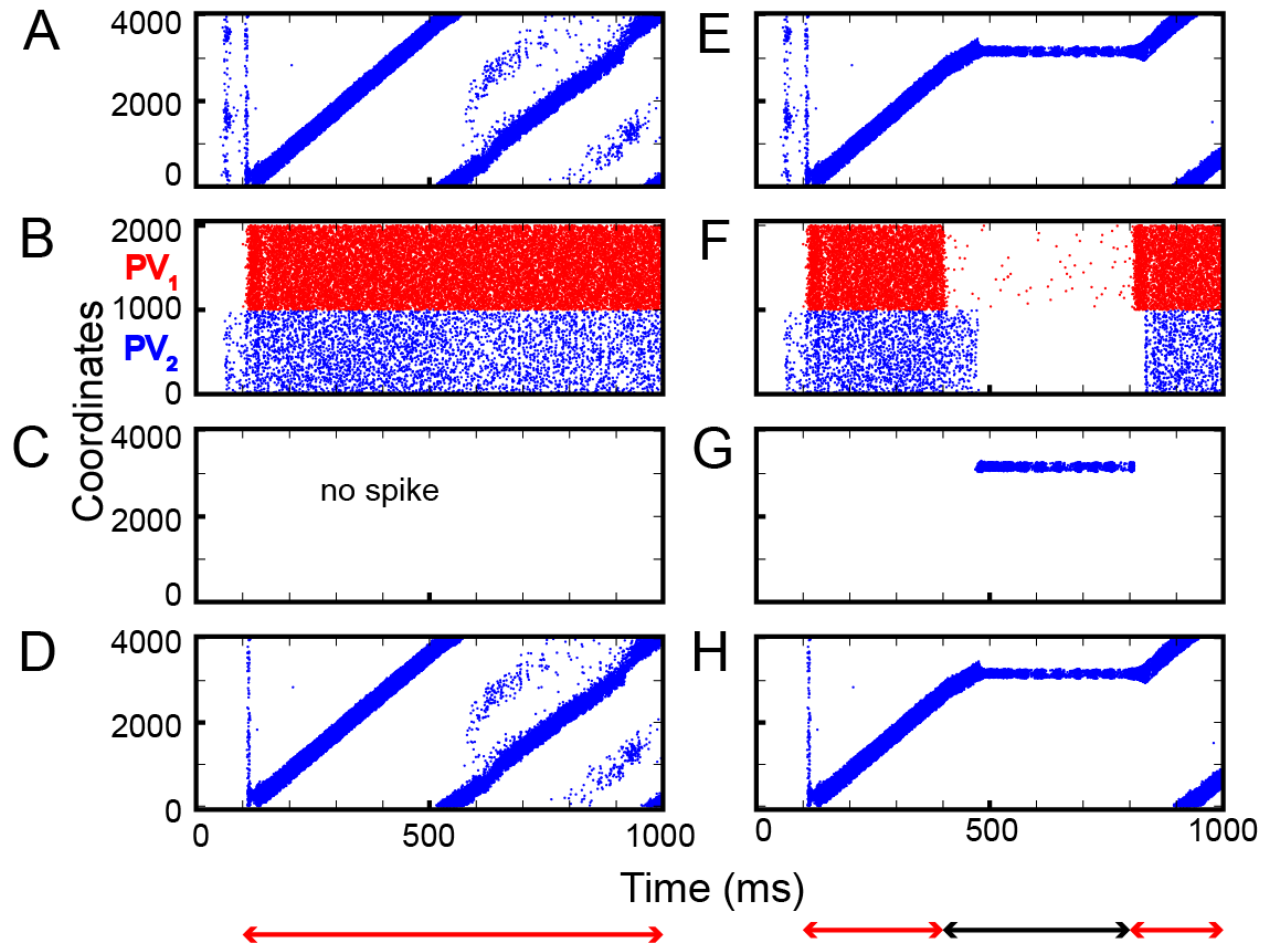

293  
 294 **Figure 4: Integration of sensory inputs with and without temporal gaps.** (A)-(D), Spiking activity in  
 295 Pyr, PV (PV<sub>1</sub> and PV<sub>2</sub>), SST<sub>1</sub> and SST<sub>2</sub> neurons in response to constant sensory input. During stimulus  
 296 presentation (100-1000 ms, marked as the red arrow), the location of bump propagates through the circular  
 297 lattice: PV neurons fire asynchronously. SST<sub>1</sub> neurons are quiescent, whereas SST<sub>2</sub> activity mimics Pyr  
 298 activity. (E)-(F), Raster plots of Pyr, PV, SST<sub>1</sub> and SST<sub>2</sub> activity, respectively, when there was a temporal  
 299 gap between stimulus presentations. During the gap (300-800 ms, marked by the black arrow), SST<sub>1</sub>  
 300 neurons became active, and the bump activity of Pyr neurons stayed at the same location.

301  
 302 As in the discrete integrator, during the temporal gap in sensory information, the PV<sub>1</sub> and PV<sub>2</sub>  
 303 neurons (Fig. 4F) became quiescent. As a result, the inhibition from the PV<sub>1</sub> and PV<sub>2</sub> neurons to



304 the SST<sub>1</sub> neurons was reduced, which, thereby, increased SST<sub>1</sub> activity (Fig. 4G). The firing  
305 pattern of SST<sub>2</sub> neurons was comparable to that of the Pyr neurons (Fig. 4H). Because the SST<sub>1</sub>  
306 neurons were topographically connected to Pyr neurons, the SST<sub>1</sub> inhibited non-active Pyr neurons,  
307 which prevented bump activity from propagating to a new location. Together, this transforms the  
308 network into an effective attractor network.

309 Next, we asked whether the dynamics of our model depended on the strength of the sensory  
310 evidence. We asked this question because neurophysiological experiments have clearly shown  
311 that the rate of accumulation of sensory evidence is positively correlated with the strength of  
312 sensory evidence, which is, subsequently, negatively correlated with reaction time<sup>3</sup>. In classic rate-  
313 code NIs, the firing rate increases more rapidly when sensory evidence is stronger, which readily  
314 explains the correlation between reaction-time and sensory evidence strength<sup>1</sup>.

315 In contrast, in location-code NIs, the bump location represents accumulated evidence. Thus, the  
316 propagation of bump activity would need to change as the strength of the sensory evidence changed.  
317 To address this possibility, we calculated the travel time between adjacent Pyr neurons as a  
318 function of the strength (in terms of firing rate) of the sensory inputs (evidence); the strength of  
319 the sensory evidence is controlled by  $\alpha$  in Equation 3. Indeed, as shown in Fig. 5A, the travel time  
320 and  $\alpha$  were inversely correlated. In other words, analogous to changes in the firing rates of rate-  
321 code NIs, as we increased the strength of the sensory evidence, bump velocity increased; examples  
322 of the propagation of bump activity through the network as a function of different values of  $\alpha$  are  
323 shown in Fig. 5B.

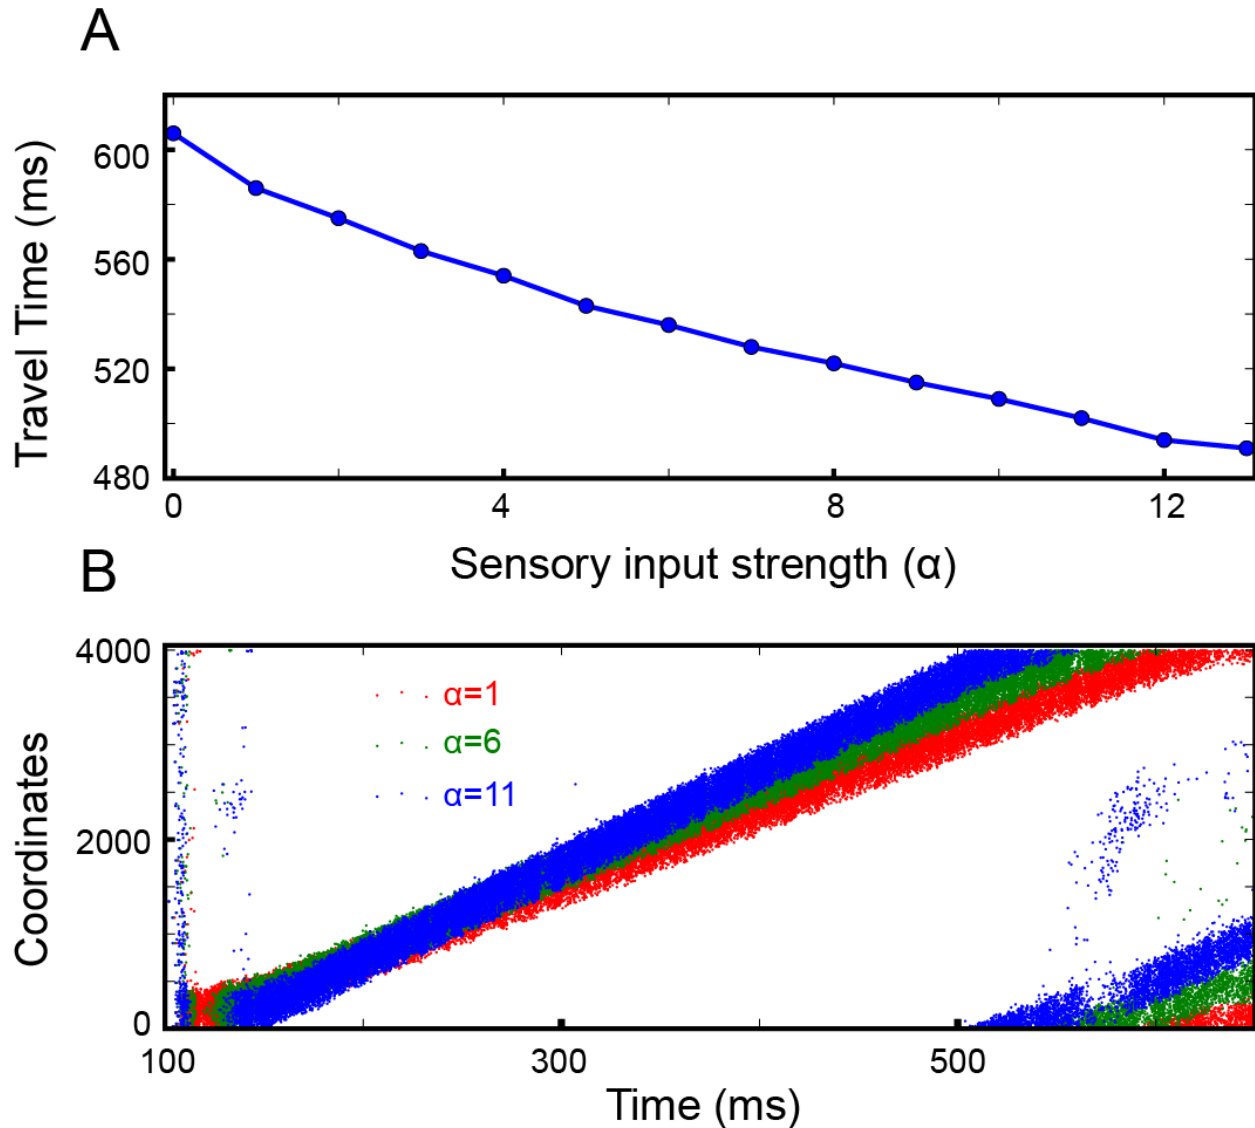

324

325 **Figure 5: The continuous integrator was sensitive to the strength of the sensory inputs.** (A), The travel  
326 time between consecutive Pyr neurons was inversely dependent on the strength of the sensory inputs;  $\alpha$   
327 represents the strength of the inputs to both Pyr and PV<sub>1</sub> cells (Equation 3). (B), Examples of propagating  
328 bump activity as a function of different values of  $\alpha$ .

329

### 330 Decision-making with location-code NIs

331 Popular decision-making models, such as sequential-sampling models, suggest that a perceptual  
332 decision is made by comparing the incoming evidence to determine the most probable choice  
333 among all available choices<sup>4,46</sup>. For instance, in a race model, evidence for two (or more)

334 alternatives is accumulated until a decision threshold is reached; the alternative that reaches the  
335 boundary first would be the perceptual decision. Alternatively, evidence can be accumulated until  
336 a set time and then the alternative with the most accumulated evidence is taken as the perceptual  
337 decision. The former and latter were referred to as ‘absolute’ and ‘relative’ criterion (i.e.,  
338 thresholds)<sup>46</sup>, respectively. Our location-code NIs can readily explain evidence integration, which  
339 suggests that these lossless integrators may be a candidate mechanism underlying race models.

340 Below, we propose a neural circuit that can compare the evidence accumulated in location-code  
341 NIs and produce a decision based on absolute or relative thresholds. In this work, we limit  
342 ourselves to consider two only alternatives (akin to a two-alternative forced-choice task); due to  
343 the assumption of interdependency of integrators, it is straightforward to extend the model to  
344 operate with multiple choice tasks.

### 345 [Selective and exclusive connections between integrators and readout neurons can](#) 346 [implement an absolute threshold for decision-making](#)

347 The location of bump activity in the integrator (relative to the initial point of bump generation) can  
348 represent an absolute threshold for a single alternative. If the decision requires a comparison of  
349 two alternatives, it is necessary to find the integrator in which the bump activity arrives first at the  
350 ‘threshold’ neurons. We noted that earlier biologically-plausible models of decision-making relied  
351 on two recurrent populations with lateral inhibition<sup>46,47</sup>. Although the details vary over models, in  
352 principle, two recurrent populations represent two alternatives, and the decision is represented by  
353 the exclusive activation of one of two populations; due to lateral inhibition, this exclusive  
354 activation corresponds to an attractor state in the system. Inspired by these studies, we examined  
355 if two recurrent populations, which interacted with each other via lateral inhibition, can detect the  
356 moment and the identity of integrator when the bump activity arrives first at one integrator’s

357 threshold neurons. As seen in Fig, 6A, we built two integrators (1 and 2), each of which was  
358 connected to a distinct population of readout neurons (i.e., the recurrent network). We assumed  
359 that the last 100 (out of 4000) Pyr neurons in each integrator were ‘threshold’ neurons, and the two  
360 readout neuronal populations in the model mutually inhibited each other via di-synaptic inhibition  
361 (Fig. 6A).

362 In the simulations, we titrated the strength of sensory evidence between the two integrators:  
363 integrator 1 (i.e., alternative 1) had stronger sensory inputs ( $\alpha=8$ ) than integrator 2 (i.e., alternative  
364 2;  $\alpha=3$ ); see Equation 3. As seen Fig. 6B, the bump activity reached the threshold neurons (i.e., the  
365 last 100 Pyr neurons) faster in integrator 1 due to the stronger sensory evidence. We also noted  
366 that the readout neurons, which were exclusively connected to the threshold neurons, fired  
367 persistently even after the threshold neurons stopped firing (Fig. 6C), which was maintained via  
368 recurrent connections within the readout neurons. That is, the readout neurons not only detected  
369 the moment of crossing of threshold but also can store the decision (at least temporarily). These  
370 results suggest that the exclusive connections between the integrator and readout neurons can be a  
371 realization of an absolute threshold model of decision-making.

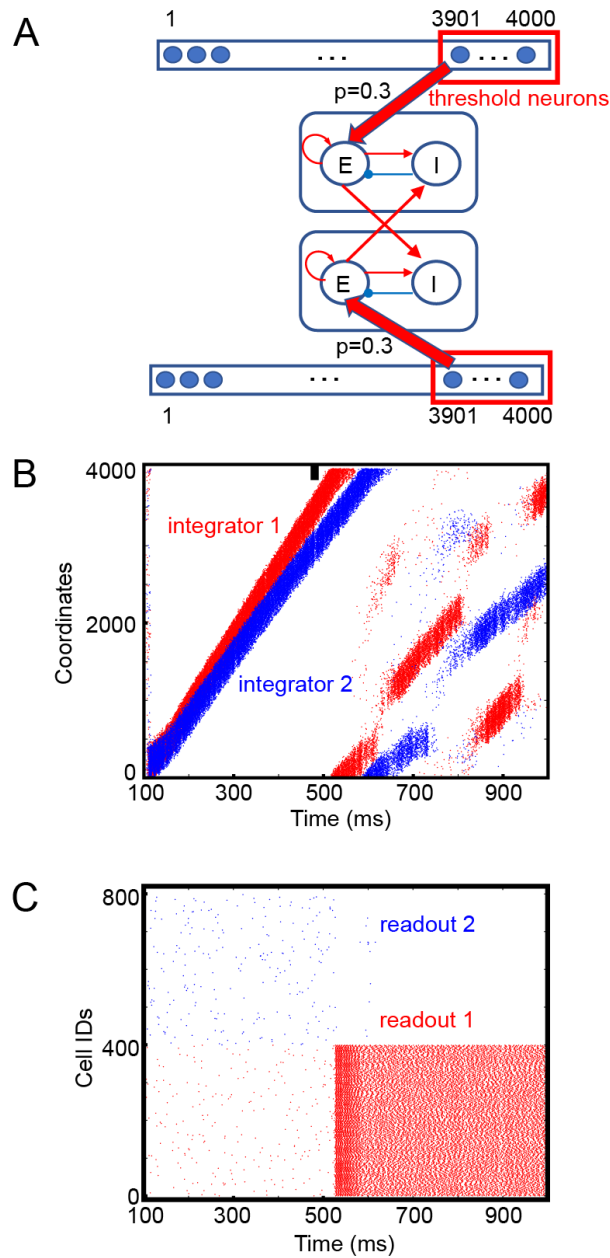

372

373 **Figure 6: Readout schemes for decisions based on absolute thresholds.** (A), We assumed that there two  
 374 continuous location-code integrators (top and bottom of schematic) and that 50 (out of 100) randomly  
 375 chosen threshold neurons (i.e., the last 100 of the 4000 Pyr neurons in each continuous integrator) projected  
 376 to excitatory neurons (E) in one of two readout neuronal populations. E neurons projected to other E and  
 377 inhibitory readout neurons (I) within the population, and the connection probabilities for E-E and E-I  
 378 connections were 0.3 and 0.1, respectively. The connection probabilities of cross-population connections  
 379 and inhibitory connections were 0.5 and 0.1, respectively. The strengths of the excitatory and inhibitory  
 380 connections were 0.12 and 0.72 pA. (B), Raster plot of the two integrators. The first and second integrators  
 381 are represented in red and blue, respectively. Because the first integrator had stronger stimulus inputs than  
 382 the second one, bump activity propagated faster in the first integrator than in the second. The thick black  
 383 vertical line represents the threshold neurons. (C), Raster plots of two populations of readout neurons,  
 384 shown in red and blue, respectively.

## 385 Gradient connections can implement relative thresholds for decision-making

386 A relative threshold requires readout neurons to track the accumulated evidence in both integrators,  
387 whenever necessary. The mechanism described above cannot track this information because the  
388 readout neurons are agnostic about the location of bump activity until it reaches the threshold  
389 neurons.

390 In contrast, if the readout neurons are connected to Pyr neurons in integrators via a connection  
391 probability that linearly increases as a function of the coordinates of integrator's Pyr neurons, it is  
392 possible to realize a relative threshold. Pyr neurons in the integrator 1 projected to excitatory  
393 neurons in readout neuronal population 1 and inhibitory neurons in readout neuronal population 2.  
394 Integrator 2 is connected to readout neurons in an analogous manner (Fig. 7A). This gradient  
395 connection is consistent with the notion that synaptic connectivity (connection probability) decays  
396 over distance<sup>48</sup>. The maximal connection probability  $p_0$  in the model can determine the overall  
397 number of connections between the integrator and readout neurons.

398 Because integrator 1 received stronger sensory inputs ( $\alpha=8$ ) than integrator 2 ( $\alpha=3$ ), bump activity  
399 in the two integrators propagated at different speeds (Fig. 7B). As seen in Fig. 7C, readout neuronal  
400 population 1 had more activity than population 2. Further, its activity increased until bump activity  
401 returned to the initial location (due to the periodic boundary condition), suggesting that the spiking  
402 activity of readout population 1 reflected the difference between evidences. This observation is  
403 consistent with this network implementing a relative threshold for decision-making.

404 We also found that the spiking activity of readout population 1 is correlated with the difference in  
405 the sensory strength of sensory evidence between the two integrators (Fig. 7D). The average firing  
406 rate of readout neurons increased faster when the difference in sensory evidence between the two  
407 alternatives was stronger, which further supports our idea that this gradient-connection network

408 can implement a relative threshold for decision-making. In addition, the spiking activity of the  
 409 readout neurons in population 1 can grow more rapidly when a higher  $p_0$  is chosen (Fig. 7E), which  
 410 is evidence that that denser connections between the integrators and the readout neurons lead to  
 411 faster decision times.

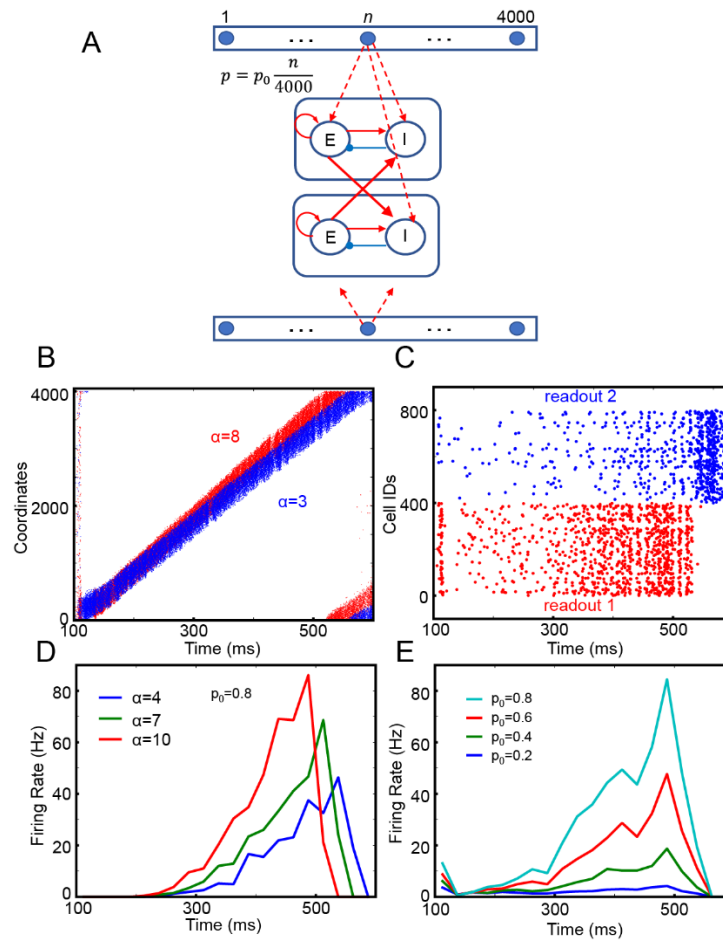

412

413 **Figure 7: Readout schemes for decisions based on relative thresholds.** (A), We assumed that there two  
 414 continuous integrators (top and bottom of schematic) and that each Pyr neurons in each continuous  
 415 integrator projected to excitatory neurons (E) in one of two readout neuronal populations. The connection  
 416 probability ( $p$ ) increased, as the coordinate of Pyr neurons increased.  $P_0$  is the maximal connection  
 417 probability. In this simulation, both E and I neurons received 200-Hz external inputs via synapses whose  
 418 strength was 1.3 pA. (B), Raster plot of the two integrators. The first and second integrators are represented  
 419 in red and blue, respectively. Because the first integrator had stronger stimulus inputs than the second one,  
 420 bump activity propagated faster in the first integrator than in the second. (C), Raster plots of two populations  
 421 of readout neurons, shown in red and blue, respectively. (D), Time course of spiking activity of integrator-  
 422 1 neurons as a function of time and the strength of sensory input to integrator 1. The strength of sensory  
 423 input to integrator 2 was fixed at  $\alpha=1$ , and  $p_0=0.8$ . (E), Time course of spiking activity of integrator-1  
 424 neurons as a function of maximal probability  $p_0$ .

## 425 Temporal profile of spiking activity in the readout neurons: stepping versus ramping

426 Rate-code NIs account for both individual and population-level ‘ramping’ (accumulating) activity  
427 in cortical regions like area LIP<sup>2,3,5</sup>. However, whereas population-level activity ramps, individual  
428 neuronal activity may be better described as ‘stepping’ activity<sup>16,49</sup>.

429 To shed some light on the nature of these two forms of neuronal activity, we tested whether the  
430 readout neurons can reproduce either ramping or stepping activity by considering a single  
431 integrator and readout neuronal population. Specifically, we tested if single readout neuronal  
432 activity can be disassociated from population readout activity as a function of the connectivity  
433 between the integrator and the readout neuronal population.

434 As seen in Fig. 8A, we connected the integrator and readout neuronal population with gradient  
435 connections and varied  $p_0$  (the maximal probability of connections) to test the population and  
436 individual neuronal activity. When  $p_0=0.1$  or 1, population readout activity ramped up (Figs. 8B  
437 and C). In contrast, individual neuronal activity showed strikingly different behaviors as a function  
438 of  $p_0$  (Figs. 8D and E). When  $p_0=0.1$ , individual neuronal activity did not exhibit ramping activity  
439 (Fig. 8D). However, when  $p_0=1.0$ , individual neuronal readout activity also ramped up (Fig. 8E).

440 To further quantify these differences in activity as a function of  $p_0$ , we conducted a linear  
441 regression analysis between time and 25 ms-binned firing rates of individual neuronal activity. We  
442 found that when  $p_0=1.0$ , the firing rates of most readout neurons (313 out of 400) were significantly  
443 correlated with time ( $p<0.05$ ). In contrast, when  $p_0=0.1$ , only a fraction of neurons (6 out of 400)  
444 showed significant correlation (Fig. 8F).

445 We further tested a wider range of  $p_0$  and conducted a linear regression between  
446 population/individual neuronal activity and time. The population activity was significantly ( $p<0.05$ )  
447 correlated with the time, independent of  $p_0$  (Fig. 8G). As expected, the correlation between the



448 time and individual neuron activity depended on  $p_0$ : readout neurons produce stepping-like activity  
449 at low  $p_0$ , but at high  $p_0$ , we found ramping activity. When  $p_0$  was higher than 0.7, individual  
450 neuronal activity was significantly ( $p < 0.05$ ) correlated with the time (Fig. 8H).

451 Finally, we noticed that the individual neuronal activity was transient, unlike the experimental  
452 finding that individual cells stayed active once they stepped up to a decision<sup>16</sup>. However, the  
453 duration of individual neuron activity can be prolonged (supplemental Fig. 2) when the connection  
454 probability of recurrent connections in the readout neurons increased, which closer replicates this  
455 experimental finding<sup>16</sup>.

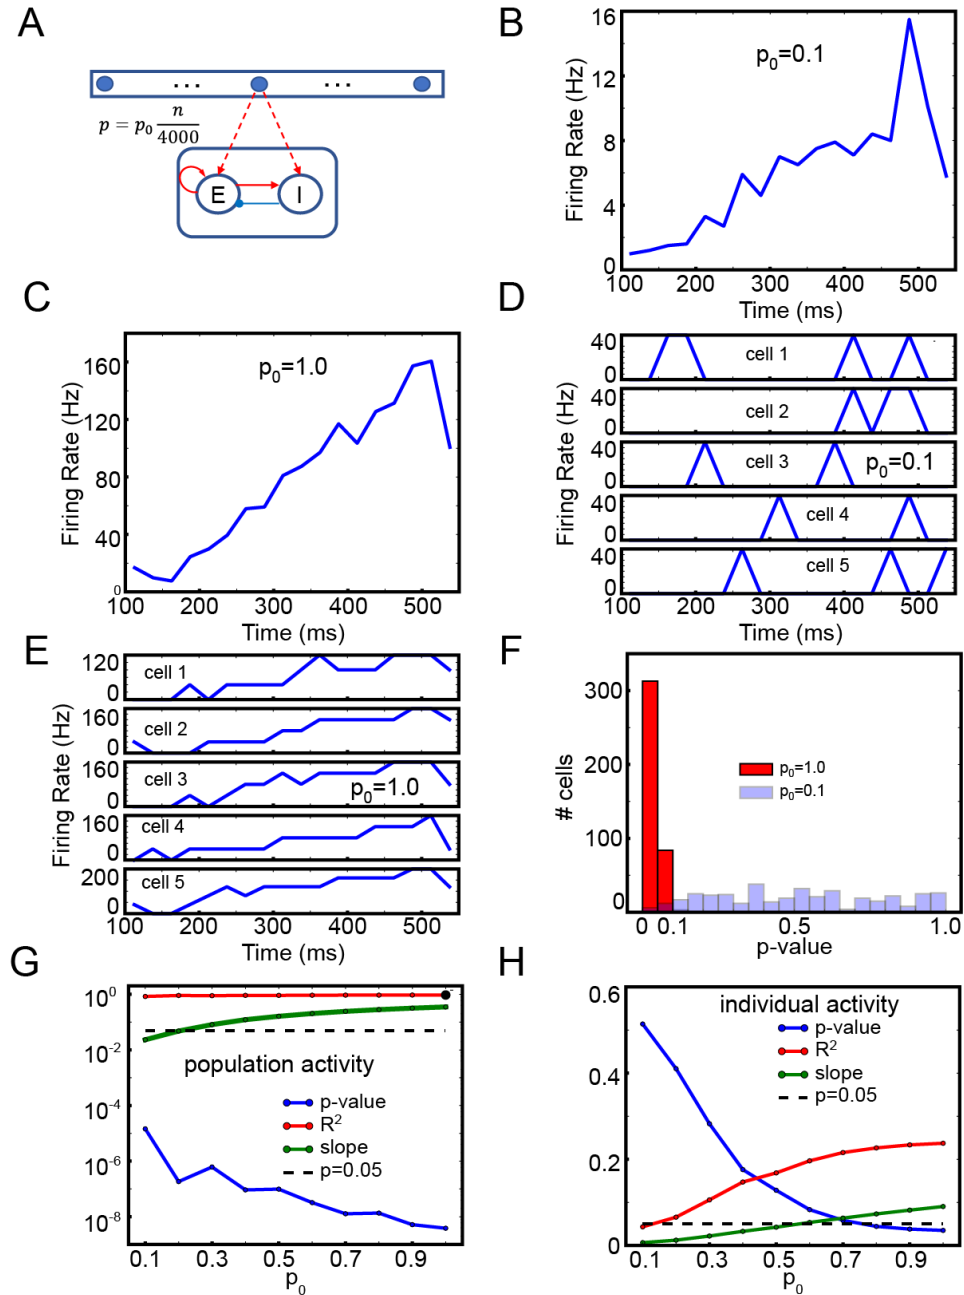

456

457 **Figure 8: Readout neuron activity with the gradient connections.** (A), The structure of single set of  
 458 integrator and readout neurons. (B), Time course of population activity with  $p_0=0.1$  (C), the same as (B)  
 459 but with  $p_0=1.0$ . (D), Time course of individual neuro activity with  $p_0=0.1$  (E), the same as (D) but with  
 460  $p_0=1.0$ . (F), Histograms of p-values with  $p_0=0.1$  and 1.0. (G), Linear regression of the average firing rate of  
 461 400 *E* readout neurons depending on  $p_0$ . (H), Linear regression of individual neuron activity depending on  
 462  $p_0$ .

## 463 Discussion

464 Perceptual decision-making relies on the accumulation of sensory evidence (i.e., decision-  
465 variables) that is extracted from ambiguous sensory stimuli<sup>2,4,5,46,50-52</sup>. It is generally thought that  
466 perceptual decision-making is instantiated through rate-code neural integrators (NIs), which are  
467 based on recurrent inputs to compensate for the leak currents<sup>1,8</sup>. However, the degree to which  
468 rate-code NIs can explain perceptual decision-making is limited. For example, rate-code NIs  
469 become unstable when there is a temporal gap in the flow of incoming sensory evidence (Fig. 3),  
470 whereas behavioral studies indicate that participants act as ‘perfect/lossless’ integrators and are  
471 not affected by these temporal gaps<sup>11,12</sup>.

472 How then can the brain make reliable decisions even with temporal gaps? We propose that the  
473 cortex can integrate sensory evidence and maintain accumulated evidence during temporal gaps  
474 by utilizing location-code NIs, in which the location of bump activity represents the amount of  
475 presented sensory evidence<sup>9,10</sup>; see below. In our simulations, bump activity in the integrator  
476 progressed through the network when sensory inputs were provided but stayed at the same location  
477 in the absence of sensory information. The location of the bump was stable due to the inhibition  
478 of SST cells (Figs. 2 and 4). This indicates that our integrator, unlike traditional rate-code NIs, can  
479 account for the robustness of perceptual decision-making during temporal gaps in sensory  
480 evidence.

481 We note that sequential activation, consistent with bump activity propagation in our model, has  
482 been observed in multiple brain regions<sup>53,54</sup> including the visual cortex<sup>17-19,55,56</sup>, parietal cortex<sup>21</sup>  
483 and frontal cortex<sup>57</sup>. Notably, Harvey et al.<sup>21</sup> found that posterior parietal cortex neurons were  
484 sequentially activated during decision-making, raising the possibility that location-code NIs can

485 exist in association cortical regions like area LIP. That is, it is plausible that both location-code  
486 NIs and readout neurons coexist in area LIP, in which both stepping and ramping activity has been  
487 observed.

## 488 [Comparison to other location code NIs](#)

489 In terms of function, our model reproduces the findings of previously reported location-code NIs,  
490 which modeled head-direction neurons encoding the direction of an animal's head relative to its  
491 body and independent of its location in the environment<sup>9</sup>. However, the underlying mechanisms  
492 between our NI and previously described ones are quite distinct.

493 In previous location-code NIs, the shift in the location of bump activity was realized by so-called  
494 “rotation” neurons, which employed either strictly excitatory neurons<sup>10</sup> or strictly inhibitory  
495 neurons<sup>9</sup>; these rotation neurons are located in the portion of the thalamus that receives inputs from  
496 the vestibular system. In contrast, we found that a cortical circuit, which consisted of excitatory  
497 pyramidal neurons and different types of inhibitory interneurons, can readily implement a location-  
498 code NI.

499 More specifically, two common inhibitory cortical neurons<sup>30</sup> –PV and SST interneurons– made  
500 distinct contributions to this operation. PV neurons, which provided nonspecific feedback  
501 inhibition to pyramidal neurons<sup>35,58</sup>, ensured that bump activity existed only at a single location.  
502 On the other hand, SST neurons mediated lateral inhibition and transformed the network into an  
503 effective attractor network capable of maintaining accumulated evidence even during temporal  
504 gaps in sensory information (Figs. 2C and 4G). We note that this theoretical finding is consistent  
505 with the empirical finding that SST cells are selectively activated during a delay period when a  
506 stimulus is removed and an animal needs to remember task-relevant information<sup>59</sup>. In contrast to

507 the role that interneurons and their inhibitory synapses played in our network model, depressing  
508 excitatory synapses made bump activity propagate through the network (Figs. 2D). Together, our  
509 simulation results suggest that neurons and synapses in the neocortex are indeed suitable for  
510 controlling and maintaining the propagation of bump activity.

### 511 [Sparse and dense gradient connections may be dynamically selected depending on](#) 512 [the demands](#)

513 In our model, ramping or stepping activity can emerge depending on the afferent inputs from a  
514 location-code NI. Dense gradient connections (i.e., high  $p_0$ ) induce ramping activity. On the other  
515 hand, sparse gradient connections (i.e., low  $p_0$ ) induce stepping activity.

516 Dense gradient connections have a clear functional advantage: The firing rates of readout neurons  
517 increase faster and the latency of activity initiation is shorter (Fig. 7E), which could accelerate  
518 decision-making. This raises the possibility that tasks that encourage fast decisions may require  
519 dense gradient connections, which can, in turn, induce ramping activity, a classic model of  
520 decision-making.

521 Then, what is the functional advantage of sparse connections, which induce stepping activity in  
522 the model? Sparse connections may be optimal if decision-making is confined to a specific time  
523 window. If there is a predetermined time frame in which a decision needs to be made, it is not  
524 necessary for readout neurons to be active at all times. Instead, to reduce erroneous decisions, it  
525 may be better to suppress readout neuron activity outside the time window in which the decision  
526 needs to be made. One effective way to do this would be to lower the excitability of readout  
527 neurons and activate them only when necessary. In our model, sparse connections lowered readout  
528 neuron activity (Fig. 7E). Moreover, when external sensory inputs are introduced to readout

529 neurons, categorical decision variables are correctly generated (supplemental Figs. 3A and B); the  
530 readout neurons can also hold the categorical decision when recurrent connections within the  
531 readout neurons are strong enough (supplemental Fig. 3C). That is, sparse connections may be  
532 used if decisions can be initiated via top-down signals such as expectation.

533 Together with the empirical observation<sup>60</sup> that the density of synaptic connections depends on  
534 cognitive demands, we propose that stepping and ramping modes emerge from different cognitive  
535 demands or different behavioral tasks.

### 536 **Concluding remarks**

537 Many theoretical studies have been dedicated to studying the neural correlates of persistent activity  
538 due to its potential links to cognitive functions such as decision-making<sup>1,8</sup>. Recent theoretical  
539 studies have raised the possibility that the sequential activation of neurons could be the substrate  
540 of working memory<sup>20,56,57</sup>, reigniting interest in the mechanisms underlying sequential activation.

541 While the determination of the exact mechanisms behind any cognitive functions remains difficult,  
542 we would like to underscore that our model demonstrates that cortical circuits can natively switch  
543 between two seemingly distinct states, the stable steady state (e.g., bump activity maintenance)  
544 and the sequential activation state (e.g., bump activity propagation). We are not arguing that  
545 location-code NIs preclude the existence of rate-code NIs in neural systems. As they have distinct  
546 pros and cons, we speculate that location- and rate-code NIs are rather complementary and can be  
547 selected depending on cognitive demands.

548

549

550

## 551 Methods

552 In this study, we developed lossless neural integrators, which were implemented within the NEST  
 553 environment<sup>63</sup>, a peer-reviewed, freely-available simulation package. All neurons in the model  
 554 were leaky integrate-and-fire (LIF) neurons. The excitatory and inhibitory neurons within an  
 555 integrator formed excitatory and inhibitory connections onto a set of ‘target’ neurons. All  
 556 integrator neurons and target neurons had identical internal dynamics; specifically, each  
 557 presynaptic spike induced an abrupt increase in a neuron’s membrane potential that decayed  
 558 exponentially. These neurons were implemented using the native NEST model `iaf_psc_exp`<sup>63</sup>.  
 559 Table 1 shows the exact parameters used for the neurons and synapses in both neural integrators.

560 **Table 1: Neural parameters for neurons and synapses.** When a spike arrived, the membrane potential  
 561 instantly jumped to a new value, which was determined by its capacitance (C) and time constant ( $\tau_m$ ). When  
 562 the membrane potential was higher than the spike threshold, the membrane potential was reset ( $V_{reset}$ ).  
 563 Without any external input, the membrane potential relaxed back its the resting membrane potentials ( $E_L$ ).  
 564 Synaptic events decayed exponentially with a 2-ms time constant ( $\tau_{syn}$ ). All synapses had a 1.5-ms delay  
 565 unless otherwise stated; the only exception is given in Table 2. For depressing synapses, we selected the  
 566 parameters (U and  $\tau_{ref}$ ) given below.

| Neuronal Parameters                   |       | Synaptic parameters |                                                                    |
|---------------------------------------|-------|---------------------|--------------------------------------------------------------------|
| C<br>(membrane capacitance)           | 1 pF  | $\tau_{syn}$        | 2.0 ms                                                             |
| $V_{th}$<br>(spike threshold)         | 20 mV | delay               | 1.5                                                                |
| $\tau_m$<br>(Membrane time constant)  | 20 ms | U                   | 0.2                                                                |
| $E_L$<br>(resting membrane potential) | 0 mV  | $\tau_{ref}$        | 200 ms for discrete integrator<br>500 ms for continuous integrator |
| $V_{reset}$<br>(reset after spiking)  | 0 mV  |                     |                                                                    |

567

## 568 *The structure of the discrete integrator*

569 The structure of the discrete integrator is summarized in Figs. 1A and B. As seen in Fig. 1A, the  
570 discrete integrator consisted of 19 different neuronal populations. 17 of these neuronal populations  
571 contained 400 pyramidal (Pyr) and 16 somatostatin (SST) model neurons. Within each of these 17  
572 populations, Pyr neurons formed excitatory synapses with both Pyr and SST neurons. These 17  
573 populations were topographically organized: Pyr neurons within a population had unidirectional  
574 excitatory connections with the adjacent population (e.g., population 2 projected to population 3  
575 but not back to population 1). We had a periodic boundary condition in which the (last) population  
576 17 connected to the (first) population 1; see Fig. 1B. In contrast, SST neurons formed inhibitory  
577 connections with Pyr neurons in all of the other populations. Recurrent connections between Pyr  
578 neurons within a particular population had depressing synapses<sup>24-29</sup>, but all of the other synaptic  
579 connections were static. We implemented these depressing synapses using the Tsodyks-Markram  
580 model included in the NEST distribution (Table 1).

581 The two remaining populations each had 1088 parvalbumin (PV) neurons. All of the Pyr neurons  
582 had excitatory connections with the PV neurons in one population (PV<sub>1</sub>) but not with those in the  
583 second PV population (PV<sub>2</sub>). Both PV<sub>1</sub> and PV<sub>2</sub> neurons formed non-specific inhibitory  
584 connections with Pyr and SST neurons; see Table 2 for the connection probability. These two PV  
585 populations simulated feedback and feedforward inhibition between Pyr neurons.

## 586 *The structure of the continuous integrator*

587 The continuous integrator was composed of a population of Pyr neurons, two PV populations (PV<sub>1</sub>  
588 and PV<sub>2</sub>), and two populations of SST neurons (SST<sub>1</sub> and SST<sub>2</sub>); see Fig. 1C. Table 3 lists the  
589 parameters of these neuronal populations. In this network, 4000 Pyr, SST<sub>1</sub> and SST<sub>2</sub> neurons were  
590 distributed in a circular lattice, each of which had unique coordinate between 1-4000. We



591 arbitrarily set the coordinates to increase in the clockwise direction. The neuronal numbers were  
592 arbitrary and were not constrained by the ratio of excitatory to inhibitory neurons, which is roughly  
593 4:1. It should be noted that it is straightforward to extend this network model to include more  
594 excitatory neurons. For example, instead of a single Pyr neuron at each coordinate, a small  
595 population of Pyr neurons at each coordinate can be instantiated without changing any of the  
596 details of the network structure.

597 Pyr neurons were mutually connected, via excitatory connections, to their neighboring Pyr neurons  
598 when the difference between their coordinates was  $\leq \pm 200$ , which is equivalent to a distance-  
599 dependent connection probability<sup>48</sup>. These connections were established with a periodic boundary  
600 condition: Pyr neuron 4000 and Pyr neuron 1 were mutually connected.

601 Pyr neurons interacted with the PV<sub>1</sub>, SST<sub>1</sub> and SST<sub>2</sub> populations in distinct ways. First, the pattern  
602 of connectivity between the Pyr and PV<sub>1</sub> populations was randomly generated. Second, a Pyr  
603 neuron projected only to those SST<sub>1</sub> and SST<sub>2</sub> neurons that had the same coordinates (i.e., a one-  
604 to-one topographic mapping). The connection strength was designed to be just strong enough for  
605 a single Pyr “spike” to cause a SST<sub>1</sub> or SST<sub>2</sub> neuron to fire (Table 3), like a single layer-5  
606 pyramidal-neuron spike can induce SST-expressing Martinotti neurons to fire<sup>64</sup>. Finally, SST<sub>1</sub> and  
607 SST<sub>2</sub> neurons also had inhibitory connections with Pyr neurons but had different connectivity rules.  
608 SST<sub>1</sub> neurons formed connections only with those Pyr neurons in which the SST<sub>2</sub>-and-Pyr  
609 difference was  $\geq 200$ . In contrast, SST<sub>2</sub> neurons formed connections only with those Pyr neurons  
610 with lower coordinate values.

611 Other important model details are that PV<sub>2</sub> neurons randomly inhibited SST<sub>1</sub> neurons; the  
612 connection probability is shown in Table 3. Further, the PV<sub>1</sub> and PV<sub>2</sub> populations were

613 independent of this circular lattice (see Fig. 1C). In our continuous integrator, all excitatory  
614 synapses were depressing, whereas all inhibitory synapses were static.

### 615 External inputs for both integrators

616 The excitability of each neuron depended on the sum of its synaptic inputs from all of the other  
617 neurons in the network and from external inputs. Tables 2 and 3 show the neuron-type-specific  
618 rates of these external inputs, which were modeled with Poisson spike trains. In the model, there  
619 were ‘background’ and ‘stimulus inputs’ (i.e., sensory information). Background inputs were  
620 independent of stimulus presentations and mimicked afferent inputs from other cortex<sup>65</sup>. Stimulus  
621 inputs had both ‘transient’ and ‘sustained’ modes of activity. The transient mode represented the  
622 transient onsets of neural activity that have been observed in the sensory systems including retina,  
623 lateral geniculate nucleus and cortex<sup>40–43</sup>. We assumed that this transient activity helped to ensure  
624 that bump activity was always initiated at the same location in the network. Transient inputs  
625 (duration: 100 ms) were introduced to the first 400 and 100 Pyr neurons in the discrete and  
626 continuous integrators, respectively. In contrast, the sustained sensory inputs formed projections  
627 with all Pyr, PV<sub>1</sub> and PV<sub>2</sub> neurons during the entire stimulus. The frequency ( $I_{\text{sustained}}$ ) of the  
628 sensory inputs to PV<sub>1</sub> neurons is given in Equation 3, and Pyr neurons received sensory inputs  
629 equivalent to  $4 \times I_{\text{sustained}}$ .

$$630 \quad I_{\text{sustained}} = 400 + \alpha \times 100(\text{Hz}) \quad (3)$$

631

632

633

634

635

636 **Table 2: The parameters of the discrete integrator.** We connected populations by specifying connection  
 637 probabilities and synaptic connection strengths. The first value in the parentheses is the connection  
 638 probability. The connection strengths followed Gaussian distributions. The mean values of these  
 639 distributions are the second value in the parentheses, and the standard deviations were 10% of the mean.  
 640 The excitatory and inhibitory connections could not be less than or greater than 0, respectively; when they  
 641 violated this condition, we set them to 0.

|                                                                          | Total Number                   | Background inputs<br>(Hz)        | Stimulus input (Hz;<br>sustained) |
|--------------------------------------------------------------------------|--------------------------------|----------------------------------|-----------------------------------|
| Pyr                                                                      | 6800                           | 2,800                            | 2000                              |
| PV <sub>1</sub>                                                          | 1088                           | 4,500                            | 2000                              |
| PV <sub>2</sub>                                                          | 1088                           | N/A                              | 2000                              |
| SST                                                                      | 544                            | 3,200                            | N/A                               |
| Connectivity within populations (connection probability, strength in pA) |                                |                                  |                                   |
| Pyr→Pyr                                                                  | (1.0, 1.8)                     | Pyr→SST                          | (0.4, 0.96)                       |
| PV <sub>1</sub> →PV <sub>1</sub>                                         | (0.3, -0.72)                   | PV <sub>1</sub> →PV <sub>1</sub> | (0.1, -0.72)                      |
| Connectivity across populations (connection probability, strength in pA) |                                |                                  |                                   |
| Pyr→Pyr                                                                  | (0.2, 0.12) *delay 10 ms       | PV <sub>2</sub> →SST             | (1.0, -6.0)                       |
| Pyr→PV <sub>1</sub>                                                      | (0.2, 0.12)                    | SST→Pyr                          | (1.0, -4.8)                       |
| PV <sub>1</sub> →Pyr                                                     | (0.2, -1.08)                   | SST→PV <sub>1</sub>              | (0.3, -0.6)                       |
| PV <sub>1</sub> →SST                                                     | (0.3, -0.6)                    |                                  |                                   |
| Connection strength for background and stimulus inputs in pA             |                                |                                  |                                   |
| Pyr                                                                      | 0.12                           | PV <sub>2</sub>                  | 0.36                              |
| PV <sub>1</sub>                                                          | 0.12                           | SST                              | 0.12                              |
| Onset stimulus input                                                     |                                |                                  |                                   |
| Target                                                                   | Pyr neurons<br>in population 1 | Firing rate                      | 1000 Hz                           |

642

643

644

645

646

647

648 **Table 3: The parameters of the continuous integrator.** Due to the lack of population structure, we  
 649 connected neurons by specifying the number of presynaptic neurons to each neuron type. The frequency of  
 650 stimulus inputs given below is the default value used unless stated otherwise; see also Equation 3. The first  
 651 value is the number of presynaptic neurons, and the second value is the connection strength in pA. The  
 652 excitatory and inhibitory connections could not be less than or greater than 0, respectively; when they  
 653 violated this condition, we set them to 0. The background inputs to all neurons in the continuous integrator  
 654 are mediated by synapses whose strength are 0.13 pA.

|                                                              | Total Number | Background inputs (Hz)            | Stimulus input (Hz) |
|--------------------------------------------------------------|--------------|-----------------------------------|---------------------|
| Pyr                                                          | 4000         | 3,850                             | 4,800               |
| PV <sub>1</sub>                                              | 1000         | 3,850                             | 1,200               |
| PV <sub>2</sub>                                              | 1000         | 3,000                             | 1,200               |
| SST <sub>1</sub>                                             | 4000         | 2,000                             | N/A                 |
| SST <sub>2</sub>                                             | 4000         | 2,000                             | N/A                 |
| Connectivity (Number of presynaptic neurons, strength in pA) |              |                                   |                     |
| Pyr→Pyr                                                      | (400, 0.52)  | PV <sub>1</sub> →SST <sub>1</sub> | (150, -0.78)        |
| Pyr→PV <sub>1</sub>                                          | (400, 0.52)  | PV <sub>2</sub> →SST <sub>1</sub> | (1000, -0.78)       |
| Pyr→SST <sub>1</sub>                                         | (1, 11.7)    | SST <sub>1</sub> →Pyr             | (3600, -0.78)       |
| Pyr→SST <sub>2</sub>                                         | (1, 11.7)    | SST <sub>1</sub> →PV <sub>1</sub> | (1200, -0.78)       |
| PV <sub>1</sub> →Pyr                                         | (160, -1.87) | SST <sub>2</sub> →Pyr             | (400, -0.78)        |
| PV <sub>1</sub> →PV <sub>1</sub>                             | (160, -0.78) |                                   |                     |

655

### 656 [Travelling time for the bump](#)

657 Using the continuous integrator, we tested the relationship between the propagation speed of the  
 658 bump and the strength of the sensory input by calculating the time course of the last 400 Pyr  
 659 neurons (i.e., those with 400 highest coordinates). Specifically, we generated an event-related  
 660 spike histogram using non-overlapping 10-ms bins of spiking data. ‘Travelling time of the bump’  
 661 was defined as the time, relative to stimulus onset, when the number of spikes in a single bin  
 662 exceeds the sum of the mean plus two standard deviations of the number of spikes during the  
 663 simulation period.

### 664 [Code availability.](#)

665 The simulation code is available upon request (contact JHL at [jungl@alleninstitute.org](mailto:jungl@alleninstitute.org)) without  
666 any restrictions and will be publicly available.

667

## 668 Author Contributions

669 JHL, JT, SV and YEC designed research; JHL performed research and analyzed data; JHL, JT, SV  
670 and YEC wrote the paper.

## 671 Acknowledgements

672 JHL wishes to thank the Allen Institute founders, Paul G. Allen and Jody Allen, for their vision,  
673 encouragement and support. YEC was supported by funding from the NIDCD-NIH and Boucai  
674 Hearing Restoration Fund. We also want to thank Heather Hersh and Joshua Gold for helpful  
675 comments.

## 676 COMPETING INTERESTS STATEMENT

677 The authors declare that they have no competing financial interests.

678

## 679 References

- 680 1. Goldman, M. S., Compte, A. & Wang, X.-J. Neural Integrator Models. *Encycl. Neurosci.*  
681 **6**, 165–178 (2009).
- 682 2. Roitman, J. D. & Shadlen, M. N. Response of neurons in the lateral intraparietal area  
683 during a combined visual discrimination reaction time task. *J. Neurosci.* **22**, 9475–89  
684 (2002).

- 685 3. Gold, J. & Shadlen, M. The neural basis of decision making. *Annu. Rev. Neurosci.* **30**,  
686 535–574 (2007).
- 687 4. Smith, P. L. & Ratcliff, R. Psychology and neurobiology of simple decisions. *Trends*  
688 *Neurosci.* **27**, 161–168 (2004).
- 689 5. Mazurek, M. E., Roitman, J. D., Ditterich, J. & Shadlen, M. N. A Role for Neural  
690 Integrators in Perceptual Decision Making. *Cereb. Cortex* **13**, 1257–1269 (2003).
- 691 6. Kim, J. N. & Shadlen, M. N. Neural correlates of a decision in the dorsolateral prefrontal  
692 cortex of the macaque. *Nat. Neurosci.* **2**, 176–185 (1999).
- 693 7. Ding, L. & Gold, J. I. Neural correlates of perceptual decision making before, during, and  
694 after decision commitment in monkey frontal eye field. *Cereb. Cortex* **22**, 1052–1067  
695 (2012).
- 696 8. Wang, X. J. Neural dynamics and circuit mechanisms of decision-making. *Curr. Opin.*  
697 *Neurobiol.* 1–8 (2012). doi:10.1016/j.conb.2012.08.006
- 698 9. Song, P. & Wang, X.-J. Angular path integration by moving ‘hill of activity’: a spiking  
699 neuron model without recurrent excitation of the head-direction system. *J. Neurosci.* **25**,  
700 1002–1014 (2005).
- 701 10. Skaggs, W. E., Knierim, J. J., Kudrimoti, H. S. & McNaughton, B. L. A model of the  
702 neural basis of the rat’s sense of direction. *Adv. Neural Inf. Process. Syst.* **7**, 173–180  
703 (1995).
- 704 11. Kiani, R., Churchland, A. K. & Shadlen, M. N. Integration of direction cues is invariant to  
705 the temporal gap between them. *J. Neurosci.* **33**, 16483–9 (2013).

- 706 12. Liu, A. S. K., Tsunada, J., Gold, J. I. & Cohen, Y. E. Temporal Integration of Auditory  
707 Information Is Invariant to Temporal Grouping Cues 1 , 2 , 3. *eNeuro* **2**, (2015).
- 708 13. Cain, N., Barreiro, A. K., Shadlen, M. N. & Shea-Brown, E. Neural integrators for  
709 decision making: a favorable tradeoff between robustness and sensitivity. *J. Neurophysiol.*  
710 **109**, 2542–59 (2013).
- 711 14. Durstewitz, D. & Deco, G. Computational significance of transient dynamics in cortical  
712 networks. *Eur. J. Neurosci.* **27**, 217–227 (2008).
- 713 15. Warden, M. R. & Miller, E. K. Task-Dependent Changes in Short-Term Memory in the  
714 Prefrontal Cortex. *J. Neurosci.* **30**, 15801–15810 (2010).
- 715 16. Latimer, K. W., Yates, J. L., Meister, M. L. R., Huk, A. C. & Pillow, J. W. Single-trial  
716 spike trains in parietal cortex reveal discrete steps during decision-making. *Science* (80-. ).  
717 **349**, 182–187 (2015).
- 718 17. Beggs, J. M. & Plenz, D. Neuronal avalanches are diverse and precise activity patterns  
719 that are stable for many hours in cortical slice cultures. *J. Neurosci.* **24**, 5216–29 (2004).
- 720 18. Ikegaya, Y. *et al.* Synfire Chains and Cortical Songs: Temporal Modules of Cortical  
721 Activity. *Sci. (New York, NY)* **559**, (2004).
- 722 19. Xu, S., Jiang, W., Poo, M.-M. & Dan, Y. Activity recall in a visual cortical ensemble. *Nat.*  
723 *Neurosci.* **15**, 449–55, S1-2 (2012).
- 724 20. Rajan, K., Harvey, C. D. & Tank, D. W. Recurrent Network Models of Sequence  
725 Generation and Memory. *Neuron* **90**, 128–142 (2016).
- 726 21. Harvey, C. D., Coen, P. & Tank, D. W. Choice-specific sequences in parietal cortex

- 727 during a virtual-navigation decision task. *Nature* **484**, 62–8 (2012).
- 728 22. York, L. C. & van Rossum, M. C. W. Recurrent networks with short term synaptic  
729 depression. *J. Comput. Neurosci.* **27**, 607–620 (2009).
- 730 23. Romani, S. & Tsodyks, M. Short-term plasticity based network model of place cells  
731 dynamics. *Hippocampus* **25**, 94–105 (2015).
- 732 24. Markram, H., Wang, Y. & Tsodyks, M. Differential signaling via the same axon of  
733 neocortical pyramidal neurons. *Proc Natl Acad Sci U S A* **95**, 5323–8. (1998).
- 734 25. Fuhrmann, G., Segev, I., Markram, H. & Tsodyks, M. Coding of Temporal Information by  
735 Activity-Dependent Synapses. *J. Neurophysiol.* **87**, 140–148 (2002).
- 736 26. Reyes, A. *et al.* Target-cell-specific facilitation and depression in neocortical circuits. *Nat.*  
737 *Neurosci.* **1**, 279–285 (1998).
- 738 27. Lefort, S. & Petersen, C. C. H. Layer-Dependent Short-Term Synaptic Plasticity between  
739 Excitatory Neurons in the C2 Barrel Column of Mouse Primary Somatosensory Cortex.  
740 *Cereb. Cortex* **27**, 3869–3878 (2017).
- 741 28. Cheetham, C. E. J. & Fox, K. Presynaptic Development at L4 to L2/3 Excitatory Synapses  
742 Follows Different Time Courses in Visual and Somatosensory Cortex. *J. Neurosci.* **30**,  
743 12566–12571 (2010).
- 744 29. Petersen, C. C. H. Short-term dynamics of synaptic transmission within the excitatory  
745 neuronal network of rat layer 4 barrel cortex. *J. Neurophysiol.* **87**, 2904–2914 (2002).
- 746 30. Rudy, B., Fishell, G., Lee, S. & Hjerling-Leffler, J. Three groups of interneurons account  
747 for nearly 100% of neocortical GABAergic neurons. *Dev. Neurobiol.* **71**, 45–61 (2011).



- 748 31. Beierlein, M., Gibson, J. R. & Connors, B. W. Two dynamically distinct inhibitory  
749 networks in layer 4 of the neocortex. *J. Neurophysiol.* **90**, 2987–3000 (2003).
- 750 32. Hubel, D. H. & Wiesel, T. N. Receptive fields, binocular interaction and functional  
751 architecture in the cat’s visual cortex. *J. Physiol.* **160**, 106–154.2 (1962).
- 752 33. Hubel, D. H. & Wiesel, T. N. Receptive fields and functional architecture of monkey  
753 striate cortex. *J. Physiol. (London)* **195**, 215–243 (1968).
- 754 34. Ko, H. *et al.* The emergence of functional microcircuits in visual cortex. *Nature* **496**, 96–  
755 100 (2013).
- 756 35. Ma, W. -p. *et al.* Visual Representations by Cortical Somatostatin Inhibitory Neurons--  
757 Selective But with Weak and Delayed Responses. *J. Neurosci.* **30**, 14371–14379 (2010).
- 758 36. Markram, H. *et al.* Interneurons of the neocortical inhibitory system. *Nat. Rev. Neurosci.*  
759 **5**, 793–807 (2004).
- 760 37. Zhang, S. *et al.* Long-range and local circuits for top-down modulation of visual cortex  
761 processing. *Science (80-. )*. **345**, 660–665 (2014).
- 762 38. Adesnik, H., Bruns, W., Taniguchi, H., Huang, Z. J. & Scanziani, M. A neural circuit for  
763 spatial summation in visual cortex. *Nature* **490**, 226–31 (2012).
- 764 39. Jiang, X. *et al.* Principles of connectivity among morphologically defined cell types in  
765 adult neocortex. *Science (80-. )*. **350**, aac9462–aac9462 (2015).
- 766 40. Cleland, B. G., Dubin, M. W. & Levick, W. R. Sustained and transient neurones in the  
767 cat’s retina and lateral geniculate nucleus. *J. Physiol.* **217**, 473–496 (1971).
- 768 41. Piscopo, D. M., El-Danaf, R. N., Huberman, A. D. & Niell, C. M. Diverse Visual Features

- 769 Encoded in Mouse Lateral Geniculate Nucleus. *J. Neurosci.* **33**, 4642–4656 (2013).
- 770 42. De Valois, R. L., Cottaris, N. P., Mahon, L. E., Elfar, S. D. & Wilson, J. A. Spatial and  
771 temporal receptive fields of geniculate and cortical cells and directional selectivity. *Vision*  
772 *Res.* **40**, 3685–3702 (2000).
- 773 43. de la Rocha, J., Marchetti, C., Schiff, M. & Reyes, A. D. Linking the Response Properties  
774 of Cells in Auditory Cortex with Network Architecture: Cotuning versus Lateral  
775 Inhibition. *J. Neurosci.* **28**, 9151–9163 (2008).
- 776 44. Ermentrout, G. B. & David, H. T. *Mathematical Foundation of Neuroscience*. (springer,  
777 2010).
- 778 45. Ermentrout, B. XPPAUT. *Scholarpedia* **2**, 1399 (2007).
- 779 46. Ratcliff, R. & Smith, P. L. A Comparison of Sequential Sampling Models for Two-Choice  
780 Reaction Time. *Psychol Rev.* **111**, 333–367 (2004).
- 781 47. Wang, X. J. Neural dynamics and circuit mechanisms of decision-making. *Curr. Opin.*  
782 *Neurobiol.* 1–8 (2012). doi:10.1016/j.conb.2012.08.006
- 783 48. Perin, R., Berger, T. K. & Markram, H. A synaptic organizing principle for cortical  
784 neuronal groups. *Proc. Natl. Acad. Sci. U. S. A.* **108**, 5419–24 (2011).
- 785 49. Miller, P. & Katz, D. B. Stochastic transitions between neural states in taste processing  
786 and decision-making. *J. Neurosci.* **30**, 2559–2570 (2010).
- 787 50. Miller, P. *Decision Making Models. Encyclopedia of Computational Neuroscience*  
788 (Springer-Verlag New York, 2015). doi:10.4249/scholarpedia.1448
- 789 51. Ratcliff, R. A theory of memory retrieval. *Psychol. Rev.* **85**, 59–108 (1978).

- 790 52. LaBerge, D. A recruitment theory of simple behavior. *Psychometrika* **27**, 375–396 (1962).
- 791 53. Tang, A. *et al.* A Maximum Entropy Model Applied to Spatial and Temporal Correlations  
792 from Cortical Networks In Vitro. *J. Neurosci.* **28**, 505–518 (2008).
- 793 54. Pulvermuller, F. & Shtyrov, Y. Spatiotemporal signatures of large-scale synfire chains for  
794 speech processing as revealed by MEG. *Cereb. Cortex* **19**, 79–88 (2009).
- 795 55. Sato, T. K., Nauhaus, I. & Carandini, M. Traveling Waves in Visual Cortex. *Neuron* **75**,  
796 218–29 (2012).
- 797 56. Beggs, J. M. & Plenz, D. Neuronal avalanches in neocortical circuits. *J. Neurosci.* **23**,  
798 11167–77 (2003).
- 799 57. Seidemann, E., Meilijson, I., Abeles, M., Bergman, H. & Vaadia, E. Simultaneously  
800 recorded single units in the frontal cortex go through sequences of discrete and stable  
801 states in monkeys performing a delayed localization task. *J. Neurosci.* **16**, 752–768  
802 (1996).
- 803 58. Bock, D. D. *et al.* Network anatomy and in vivo physiology of visual cortical neurons.  
804 *Nature* **471**, 177–182 (2011).
- 805 59. Kim, D. *et al.* Distinct Roles of Parvalbumin- and Somatostatin-Expressing Interneurons  
806 in Working Memory. *Neuron* **92**, 902–915 (2016).
- 807 60. Purushothaman, G. & Bradley, D. C. Neural population code for fine perceptual decisions  
808 in area MT. *Nat. Neurosci.* **8**, 99–106 (2005).
- 809 61. Goldman, M. S. Memory without Feedback in a Neural Network. *Neuron* **61**, 621–634  
810 (2009).

- 811 62. Lundqvist, M. *et al.* Gamma and Beta Bursts Underlie Working Memory. *Neuron* **90**,  
812 152–164 (2016).
- 813 63. Gewaltig, M.-O. & Diesmann, M. NEST (NEural Simulation Tool). *Scholarpedia* **2**, 1430  
814 (2007).
- 815 64. Silberberg, G. & Markram, H. Disynaptic inhibition between neocortical pyramidal cells  
816 mediated by Martinotti cells. *Neuron* **53**, 735–46 (2007).
- 817 65. Potjans, T. C. & Diesmann, M. The cell-type specific cortical microcircuit: relating  
818 structure and activity in a full-scale spiking network model. *Cereb. Cortex* **24**, 785–806  
819 (2014).

820

821

822

823
